# Supplementary material for: Native Mass Spectrometry Coupled to Spectroscopic Methods to Investigate the Effect of Soybean Isoflavones on Structural Stability and Aggregation of Zinc Deficient and Metal-Free Superoxide Dismutase
Source: MDPI journal article supplement (doi:10.3390/molecules27217303), 2022-10-27
Supplement: s1 [file s1]

**Native mass spectrometry coupled to spectroscopic methods to investigate the effect of soybean isoflavones on structural stability and aggregation of zinc deficient and metal-free superoxide dismutase**

Xinyu Bian<sup>1, 2</sup>, Xiaoyu Zhuang<sup>3</sup>, Junpeng Xing<sup>1</sup>, Shu Liu<sup>1, \*</sup>, Zhiqiang Liu<sup>1</sup>, Fengrui

Song<sup>1, 2, \*</sup>

<sup>1</sup> State Key Laboratory of Electroanalytical Chemistry, Jilin Province Key Laboratory of Chinese Medicine Chemistry and Mass Spectrometry, Changchun Institute of Applied Chemistry, Chinese Academy of Sciences, Changchun, 130021, China.  
mslab9@ciac.ac.cn (X.B.); xyzhuang59@foxmail.com (X.Z.) xjp@ciac.ac.cn (J.X.); liuzq@ciac.ac.cn (Z.L.)

<sup>2</sup> School of Applied Chemistry and Engineering, University of Science and Technology of China, Hefei, 230029, China

<sup>3</sup> Experiment Center for Science and Technology, Shanghai University of Traditional Chinese Medicine, Shanghai, 201203, China

\* Correspondence: msllab20@ciac.ac.cn (S.L.) and songfr@ciac.ac.cn (F.S.); Tel.: +86-431-85262044

**Table S1.** The intensity and fading rate of MS peaks of isoflavone aglycones ( $L_{a1}$ -  $L_{a3}$ ) and glycosides ( $L_{g1}$ - $L_{g5}$ ) before (I) and after (I') adding SOD1 mixture. All compounds were analyzed under ESI negative mode.

| Compounds (m/z)          | I                  | I'                 | (I-I')/I $\times$ 100% |
|--------------------------|--------------------|--------------------|------------------------|
| $L_{a1}$ (253.03)        | $8.60 \times 10^6$ | $8.51 \times 10^6$ | 1.05%                  |
| $L_{a2}$ (269.02)        | $6.40 \times 10^6$ | $6.35 \times 10^6$ | 0.78%                  |
| $L_{a3}$ (283.03)        | $5.32 \times 10^6$ | $5.26 \times 10^6$ | 1.13%                  |
| $L_{g1}$ (415.08)        | $4.19 \times 10^6$ | $3.37 \times 10^6$ | 19.57%                 |
| $L_{g2}+L_{g3}$ (431.07) | $1.12 \times 10^7$ | $9.48 \times 10^6$ | 15.36%                 |
| $L_{g4}$ (445.08)        | $2.47 \times 10^6$ | $1.81 \times 10^6$ | 26.72%                 |

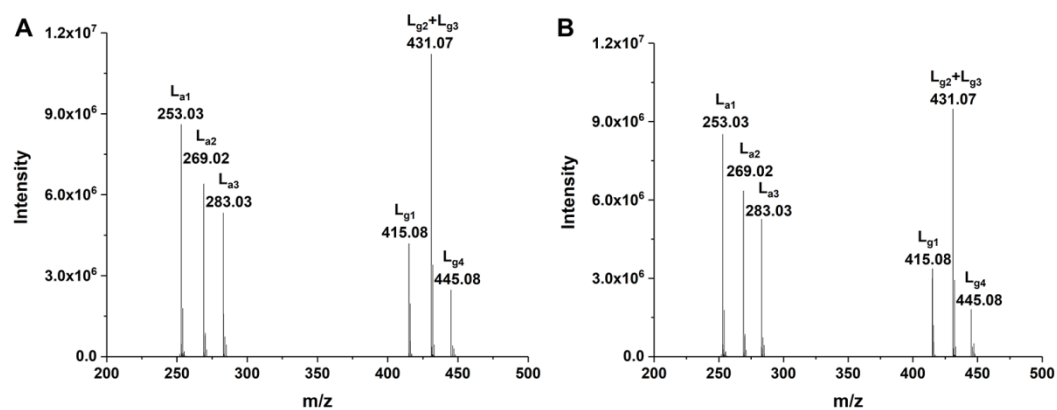

**Figure S1.** Intensity fading mass spectra of seven soybean isoflavones before (A) and after (B) adding  $P_1$ ,  $P_2$ , and  $P_3$  mixture. All peaks represent  $[M-H]^-$  ions of corresponded compounds.

**Table S2.** The relative abundance of complexes compared with the protein species at the same charge state. The percentages (P) of dimer (Di)-ligand complexes were calculated directly through MS intensity (I) of +11 charged complexes and proteins. The formula is  $P=I(\text{complex})/I(\text{protein})$ . The percentages (P) of monomer (Mo)-ligand complexes were calculated by the integrated IM peak area (A) of +6 charged monomers. The formula is  $P=A(\text{complex})/A(\text{protein})$ .

| Compounds     | Apo    |        | Cu <sub>2</sub> |        | WT     |        |
|---------------|--------|--------|-----------------|--------|--------|--------|
|               | Mo     | Di     | Mo              | Di     | Mo     | Di     |
| Daidzin       | 56.13% | 87.22% | 39.60%          | 38.01% | 24.84% | 24.13% |
| Sophoricoside | 25.18% | 56.85% | 27.93%          | 22.16% | 13.90% | 19.29% |
| Genistin      | 42.35% | 58.62% | 49.73%          | 32.68% | 21.48% | 24.54% |
| Glycitin      | 48.96% | 50.17% | 23.47%          | 22.26% | 16.41% | 17.06% |

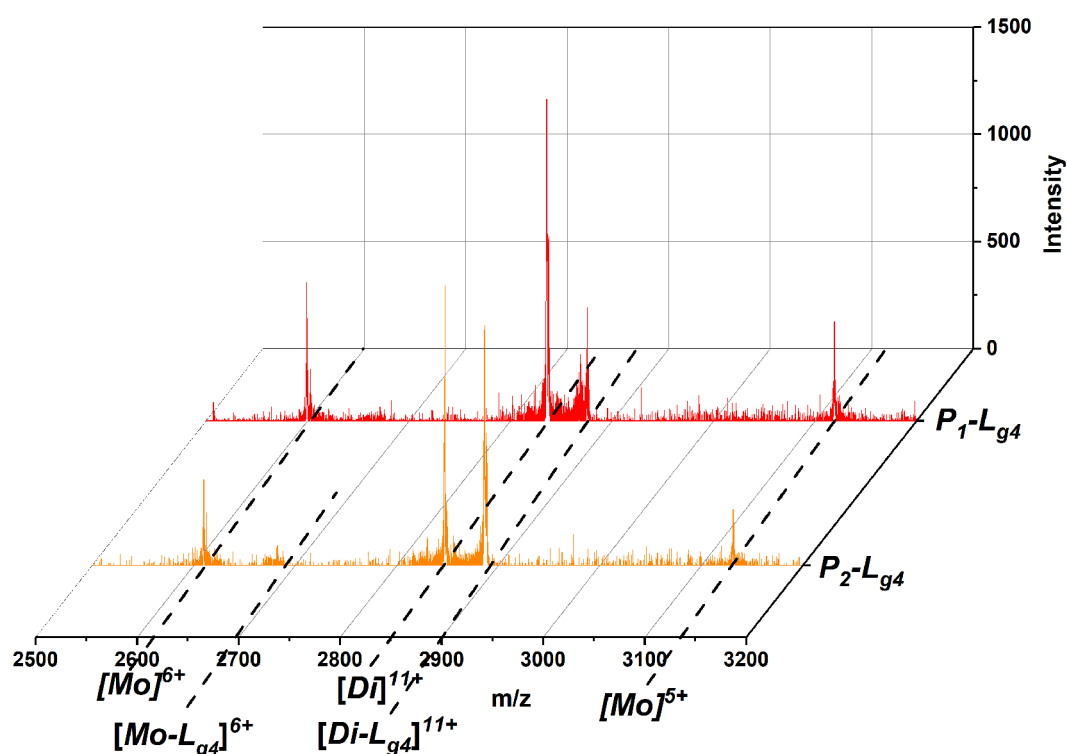

**Figure S2.** MS/MS spectra of Apo/ Cu<sub>2</sub> SOD1-glycitin (P<sub>1</sub> -L<sub>g4</sub> and P<sub>2</sub>-L<sub>g4</sub>) complexes. The Trap collision energy is set as 30V. The precursor ions are the 11+ charged ions of dimer of the complexes ([Di-L<sub>g4</sub>]<sup>11+</sup>).

**Table S3.** The relative abundance (%) of conformation A of different SOD1s and complexes.

|                | L <sub>g1</sub> | L <sub>g2</sub> | L <sub>g3</sub> | L <sub>g4</sub> | No ligand |
|----------------|-----------------|-----------------|-----------------|-----------------|-----------|
| P <sub>1</sub> | 8.25            | 11.58           | 11.22           | 14.63           | 9.77      |
| P <sub>2</sub> | 14.31           | 18.01           | 16.33           | 20.70           | 13.41     |

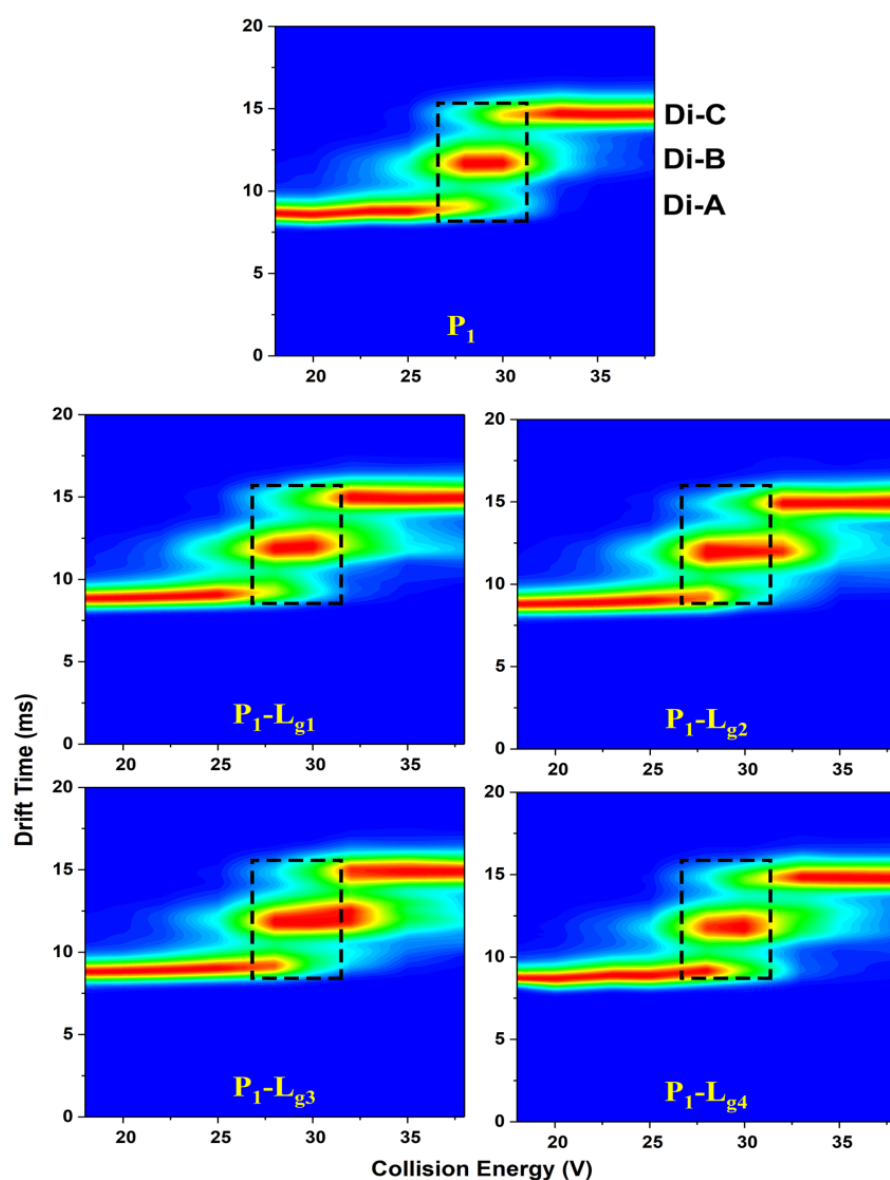

**Figure S3.** CIU heat maps of ApoSOD1 (P<sub>1</sub>) and complexes with four glycosides (L<sub>g1</sub>-L<sub>g4</sub>). The three conformations are marked at corresponding drift time. Dashed areas of trap collision voltages (26 V to 32 V) show comparison between protein and complexes on the boundary voltage of conformation conversion.

Table S4. Conversion CE (V) of Apo and Cu<sub>2</sub>SOD1(P<sub>1</sub>, P<sub>2</sub>) and their complexes with four glycosides (L<sub>g1</sub>-L<sub>g4</sub>).

| Conversion CE (V) of conformation A to B |                 |                 |                 |                 |           |
|------------------------------------------|-----------------|-----------------|-----------------|-----------------|-----------|
|                                          | L <sub>g1</sub> | L <sub>g2</sub> | L <sub>g3</sub> | L <sub>g4</sub> | No ligand |
| P <sub>1</sub>                           | 27              | 27              | 27              | 27              | 27        |
| P <sub>2</sub>                           | 28              | 29              | 29              | 29              | 30        |
| Conversion CE (V) of conformation B to C |                 |                 |                 |                 |           |
|                                          | L <sub>g1</sub> | L <sub>g2</sub> | L <sub>g3</sub> | L <sub>g4</sub> | No ligand |
| P <sub>1</sub>                           | 30              | 31              | 31              | 31              | 30        |
| P <sub>2</sub>                           | 34              | 34              | 34              | 35              | 31        |

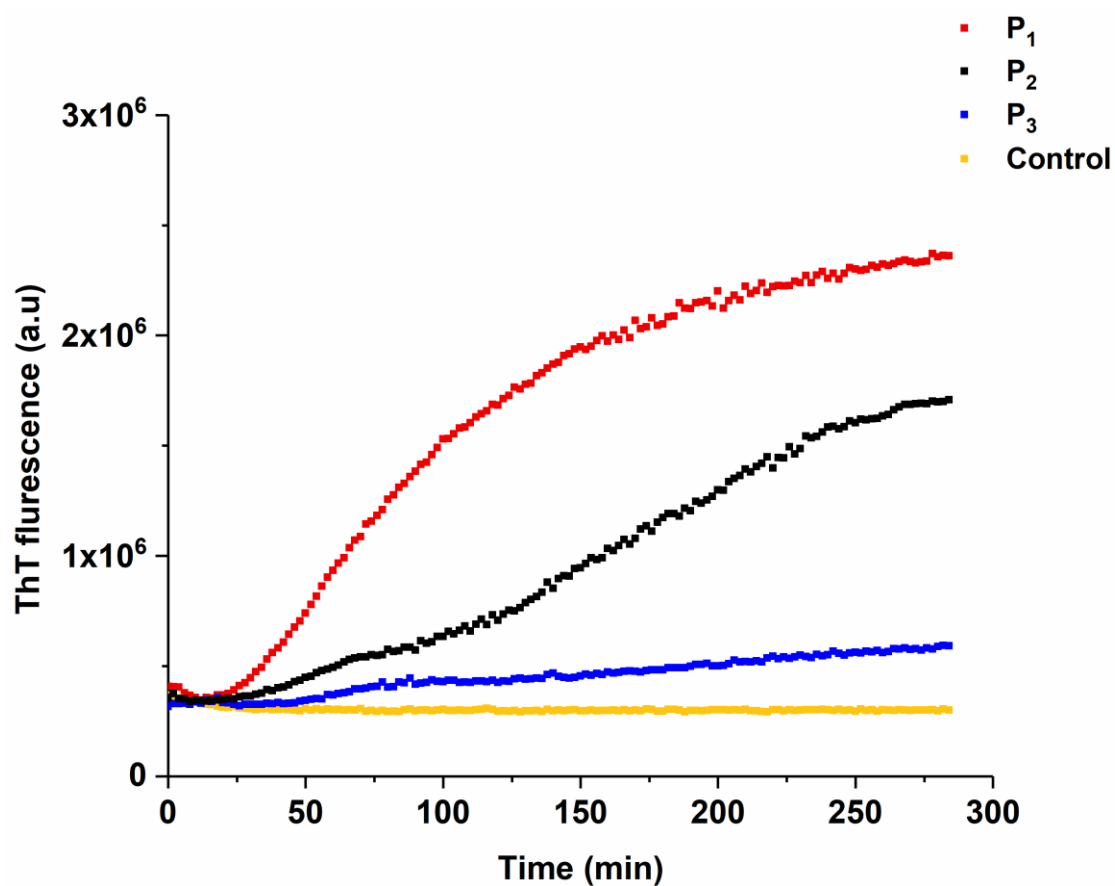

**Figure S4.** ThT fluorescence of ApoSOD1 (P<sub>1</sub>, red), Cu<sub>2</sub>SOD1 (P<sub>2</sub>, black) and Cu<sub>2</sub>Zn<sub>2</sub>SOD1 (P<sub>3</sub>, blue) induced by TFE.

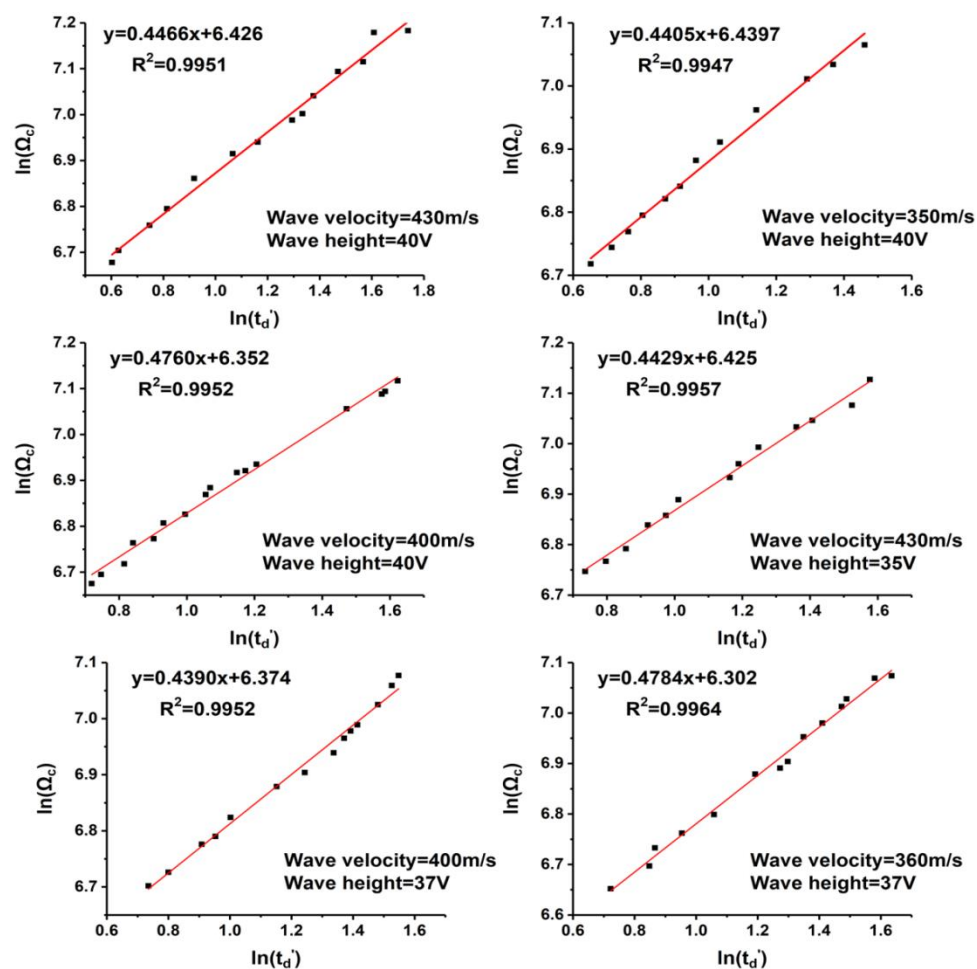

**Figure S5.** The linear fitted curves under six IM parameters (Wave velocity and Wave height) according to fomula (1) (2), standard CCS and measured drift time of cytochrome c and myoglobin.

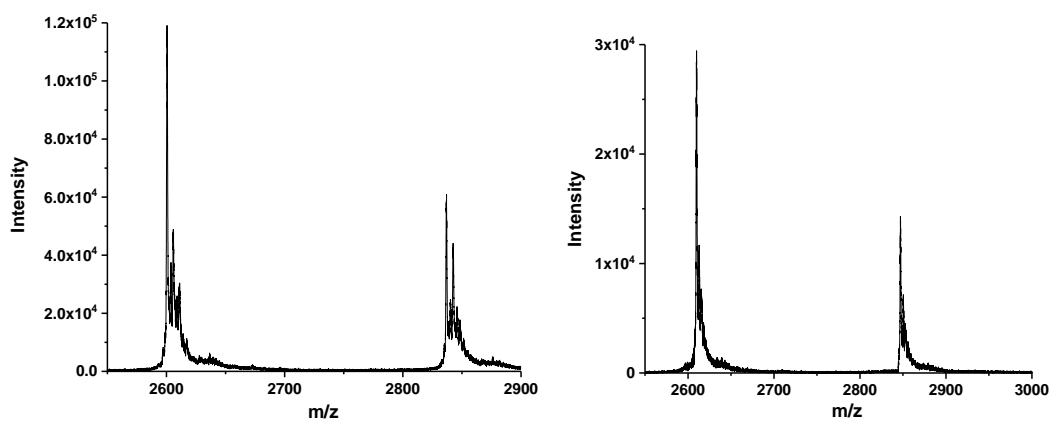

**Figure S6.** The MS spectra of ApoSOD1 (left) and  $\text{Cu}_2\text{SOD1}$  (right) products after dialysis.
